# Supplementary material for: Reduced graphene oxide/TiO2(B) nanocomposite-modified separator as an efficient inhibitor of polysulfide shuttling in Li–S batteries
Source: Royal Society of Chemistry journal article supplement (doi:10.1039/c9ra10185c), 2020-01-01
Supplement: c9ra10185c1.pdf [file c9ra10185c1.pdf]

## Supporting Information

### **Reduce graphene oxide/TiO<sub>2</sub>(B) nanocomposite modified separator as efficient suppression of polysulfide shuttling in Li-S batteries**

Peng Chen<sup>a,b,c</sup>, Zexi Wang<sup>a</sup>, Bingyu Zhang<sup>a</sup>, Heng Liu<sup>a</sup>, Wanqiang Liu<sup>\*,a,b,c</sup>, Jianxun Zhao<sup>\*\*a,b</sup>,

Zhihua Ma<sup>a,b,c</sup>, Wenyue Dong<sup>a,b,c</sup>, Zhongmin Su<sup>a,c</sup>

*<sup>a</sup>School of Materials Science and Engineering, Changchun University of Science and Technology,*

*Changchun 130022, China*

*<sup>b</sup>Engineering Research Center of Optoelectronic Functional Materials, Ministry of Education,*

*China*

*<sup>c</sup>Jilin Provincial Science and Technology Innovation Center of Optical Materials and Chemistry,*

*China*

\*Corresponding author. E-mail: [wqliu1979@126.com](mailto:wqliu1979@126.com) (W.L.), [diligentzjx@126.com](mailto:diligentzjx@126.com) (J.Z)

#### **Characterization**

The crystal structure and phase identification of the samples were analyzed by Rigaku, D/max-2500 X-ray diffractometer (XRD). Morphology was detected by the FEI Quanta 250 field-emission scanning electron microscope (SEM) and Energy-dispersive spectroscopy (EDS). X-ray photoelectron spectroscopy (XPS) was tested on the ESCALABMKLL (Thermo Fisher Scientific company). The molar ratio of sulfur (S) and lithium sulfide (Li<sub>2</sub>S) was 5:1 in electrolyte to synthesize Lithium polysulfide (Li<sub>2</sub>S<sub>6</sub>) solution and kept stirring at room temperature for 48 h in glovebox.

Cyclic voltammetry (CV) measurements were performed at a scan rate of  $0.1 \text{ mV s}^{-1}$  on the electrochemical station (CHI760D, Chenhua Instrument Company). Electrochemical impedance spectroscopy (EIS) tests were applied using the Biologic VMP3 electrochemical workstation in the frequency range from 0.01 Hz to 1 MHz. The cycling stability and rate capacity were tested using a Battery Testing System (LAND CT2001A) within a potential range of 1.7-2.8 V vs.  $\text{Li/Li}^+$ .

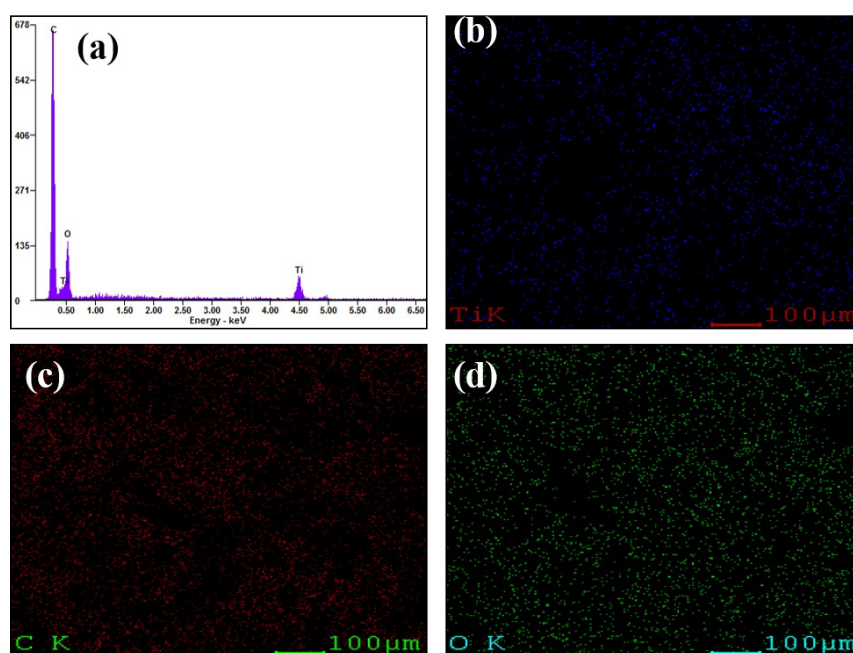

Fig. S1. EDX spectrum and mappings of the RGO/TiO<sub>2</sub>(B) composite surface.

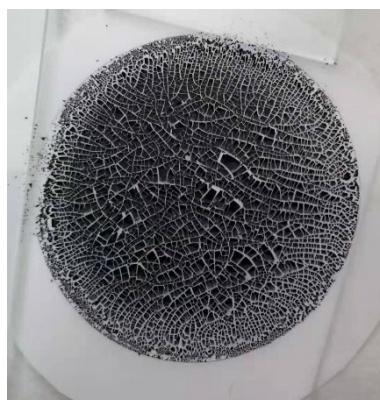

Fig. S2. The photograph of RGO/TiO<sub>2</sub>(B) modified separator with thicker coating.

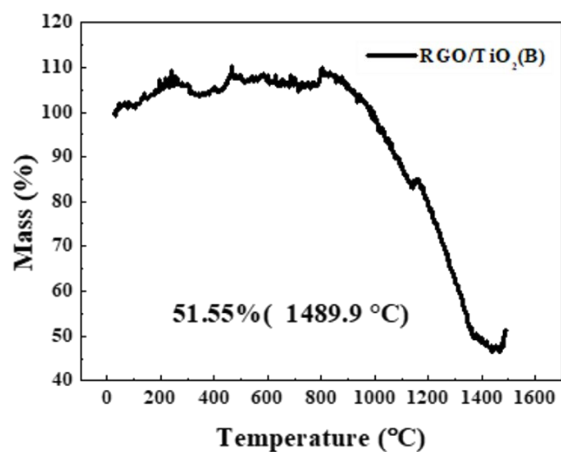

Fig. S3. Thermogravimetric analysis curve of RGO/TiO<sub>2</sub>(B).

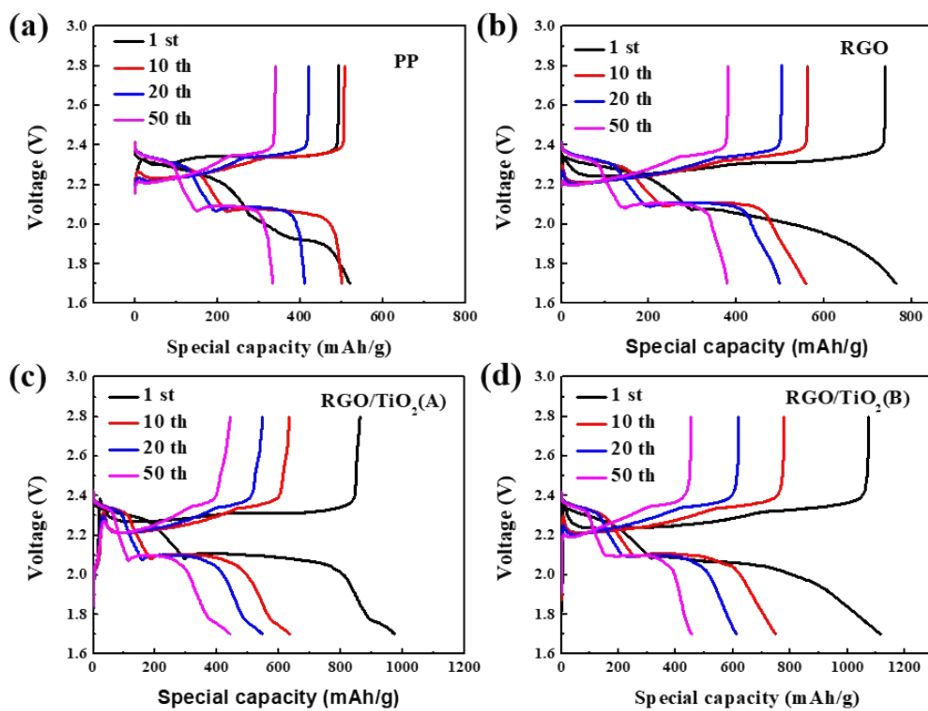

Fig. S4. The charge-discharge curves of different cycles at a rate of 0.2 C for batteries with the separators with different coating.

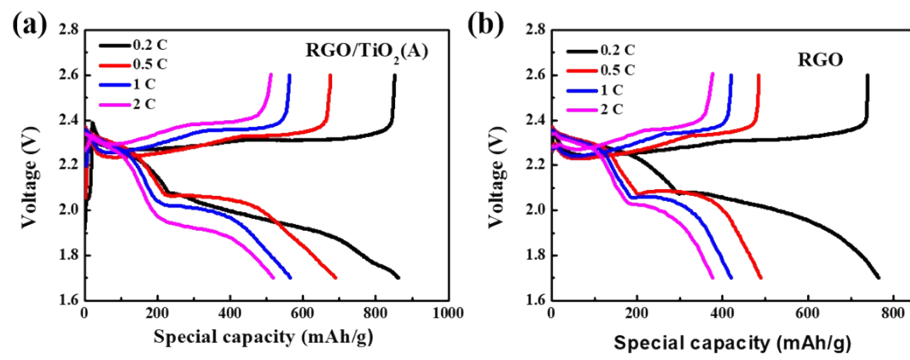

Fig. S5. The charge-discharge voltage curves of batteries with separators at various rates from 0.2 C to 2 C.
